# Supplementary material
Source: PubMed Central journal article supplement (PMC8456199)
Supplement: ADVS-8-2100316-s001.pdf [file ADVS-8-2100316-s001.pdf]

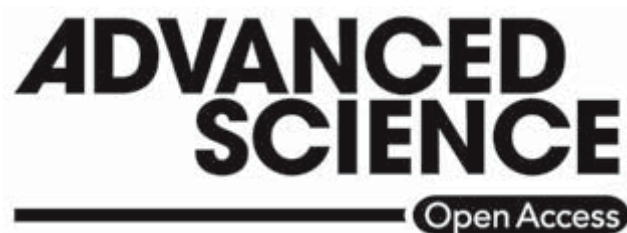

## Supporting Information

for *Adv. Sci.*, DOI: 10.1002/adv.202100316

### **Biomaterials and oxygen join forces to shape the immune response and boost COVID-19 vaccines**

*Thibault Colombani, Loek J. Eggermont, Zachary J. Rogers, Lindsay G. A. McKay, Laura E. Avena, Rebecca I. Johnson, Nadia Storm, Anthony Griffiths, Sidi A. Bencherif\**

# Supporting Information

## **Biomaterials and oxygen join forces to shape the immune response and boost COVID-19 vaccines**

Thibault Colombani<sup>1‡</sup>, Loek J. Eggermont<sup>1‡</sup>, Zachary J. Rogers<sup>1‡</sup>, Lindsay G. A. McKay<sup>2</sup>, Laura E. Avena<sup>2</sup>, Rebecca I. Johnson<sup>2</sup>, Nadia Storm<sup>2</sup>, Anthony Griffiths<sup>2</sup>, Sidi A. Bencherif<sup>1,3,4,5\*</sup>

<sup>1</sup> Department of Chemical Engineering, Northeastern University, Boston, MA 02115, USA.

<sup>2</sup> Department of Microbiology and National Emerging Infectious Diseases Laboratories, Boston University School of Medicine, Boston, MA 02118, USA

<sup>3</sup> Department of Bioengineering, Northeastern University, Boston, MA 02115, USA.

<sup>4</sup> Harvard John A. Paulson School of Engineering and Applied Sciences, Harvard University, Cambridge, MA 02138, USA.

<sup>5</sup> Biomechanics and Bioengineering (BMBI), UTC CNRS UMR 7338, University of Technology of Compiègne, Sorbonne University, 60203 Compiègne, France.

‡Authors contributed equally

\* Corresponding author: [s.bencherif@northeastern.edu](mailto:s.bencherif@northeastern.edu)

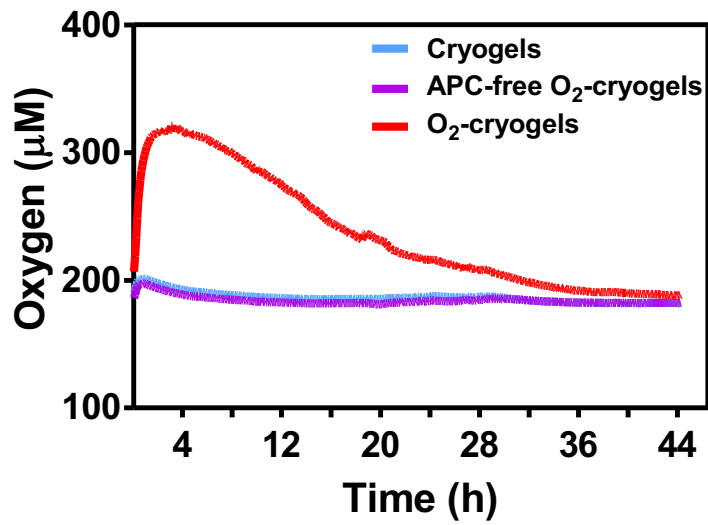

**Figure S1.  $\text{O}_2$ -cryogels enable controlled release of oxygen in their surrounding environment.** Oxygen release from Cryogels, APC-free (no catalase)  $\text{O}_2$ -cryogels, and (catalase containing)  $\text{O}_2$ -cryogels under normoxic conditions. Data are representative of n=4 experiments.

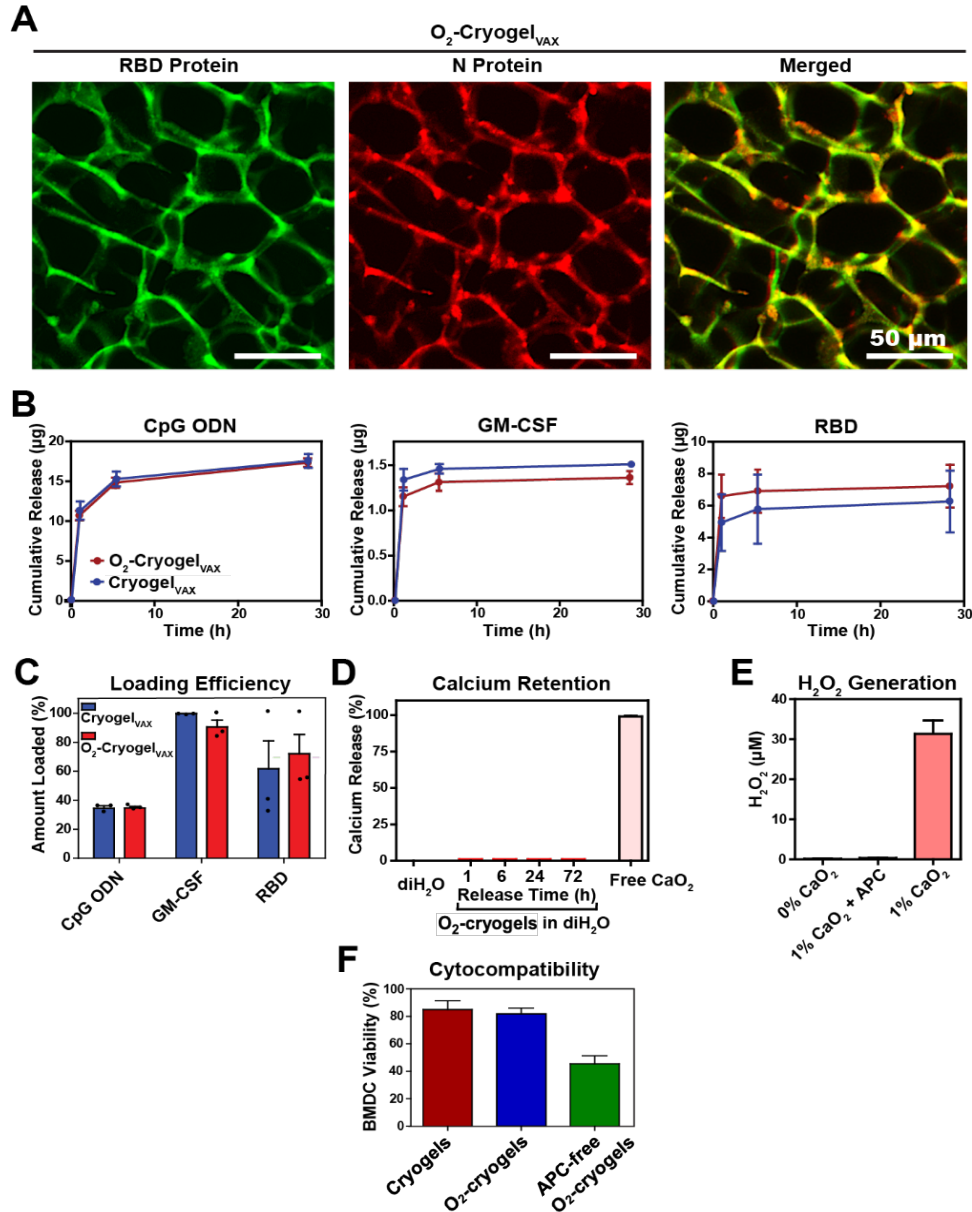

**Figure S2. Efficient encapsulation and sustained release of SARS-CoV-2 subunit proteins and immunomodulatory factors from cryogels.** (A) Confocal microscopy images showing co-encapsulation of Alexa Fluor 488-labeled RBD and Alexa Fluor 647-labeled N protein within the polymer walls of  $O_2$ -Cryogel<sub>VAX</sub>. (B) Cumulative release and (C) Loading efficiency of CpG-ODN 1826, GM-CSF and RBD in Cryogel<sub>VAX</sub> and  $O_2$ -Cryogel<sub>VAX</sub>. (D) Calcium release from  $O_2$ -cryogels, incubated at 37°C in diH<sub>2</sub>O, and quantified using a hardness test. (E) H<sub>2</sub>O<sub>2</sub> release from cryogels (no CaO<sub>2</sub>),  $O_2$ -cryogels (1% CaO<sub>2</sub> + APC) and APC-free  $O_2$ -cryogels (1% CaO<sub>2</sub>, no APC). (F) BMDC viability after 24 h of incubation within Cryogels,  $O_2$ -cryogels, and APC-free  $O_2$ -cryogels under normoxic conditions. Values represent the mean ± SEM (n=3–5). Data were analyzed using two-way ANOVA and Bonferroni post-tests to evaluate the difference between different conditions/treatments at the same time point (colored stars indicate statistical significance within a given condition of the same color), \*p < 0.05.

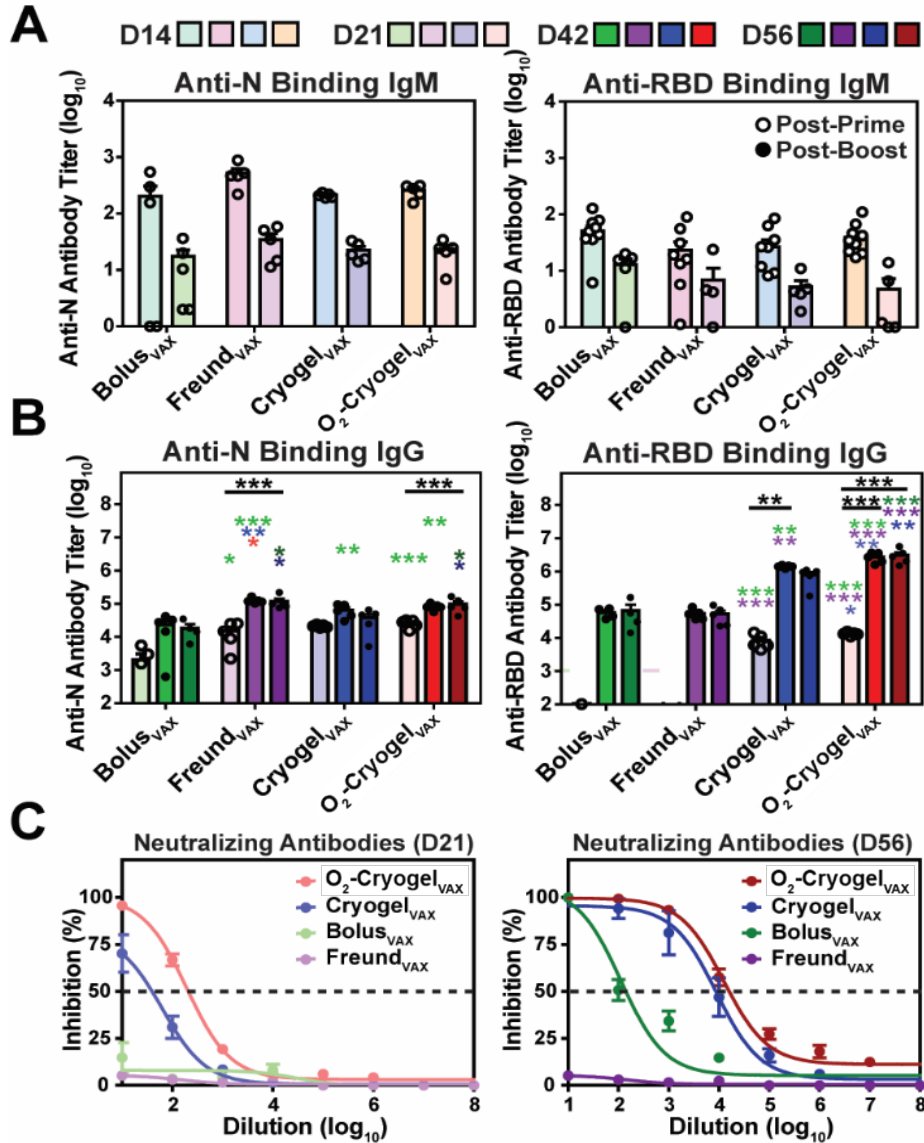

**Figure S3. O<sub>2</sub>-Cryogel<sub>VAX</sub> enhances the humoral immune response against SARS-CoV-2.** (A–B) Endpoint titers of RBD- and N- specific IgM (A: day 14 and 21) and IgG (B: day 21, 42 and 56) antibody determined by ELISA. (C) Inhibition rate as the function of serum dilution of the SARS-CoV-2 surrogate virus neutralization test at day 21 and 56. Values represent the mean  $\pm$  SEM (n=5). Data were analyzed using one-way ANOVA and Bonferroni post-tests to evaluate differences between time points (underlined dark stars indicate statistical significance) or two-way ANOVA and Bonferroni post-tests to evaluate differences between conditions at the same time point (colored stars indicate statistical significance within a given condition of the same color), \*p < 0.05, \*\*p < 0.01 and \*\*\*p < 0.001.

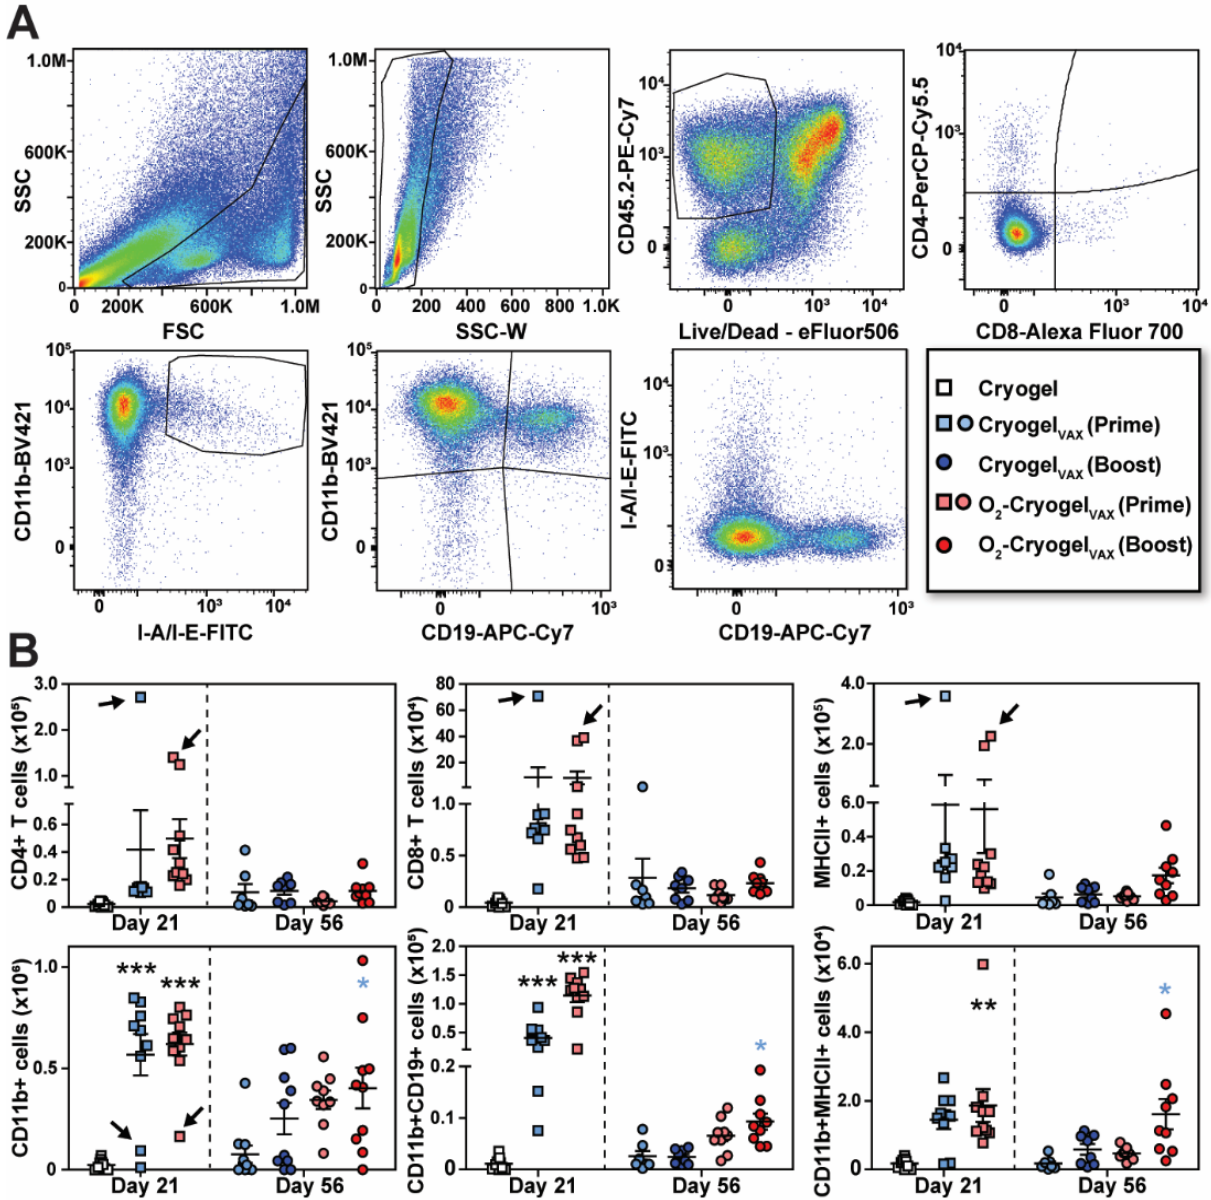

**Figure S4. Cryogels contain limited numbers of adaptive immune cells after 56 days.** (A) Flow cytometry gating strategy and (B) cell numbers in cryogels at day 21 and 56 post-vaccination. Arrows indicate corresponding gels with high numbers of T cells and MHCII<sup>+</sup> B cells. Values represent the mean  $\pm$  SEM (n=5). Data were analyzed using two-way ANOVA and Bonferroni post-tests to evaluate differences between conditions at the same time point (colored stars indicate statistical significance within a given condition of the same color), \*p < 0.05, \*\*p < 0.01 and \*\*\*p < 0.001.

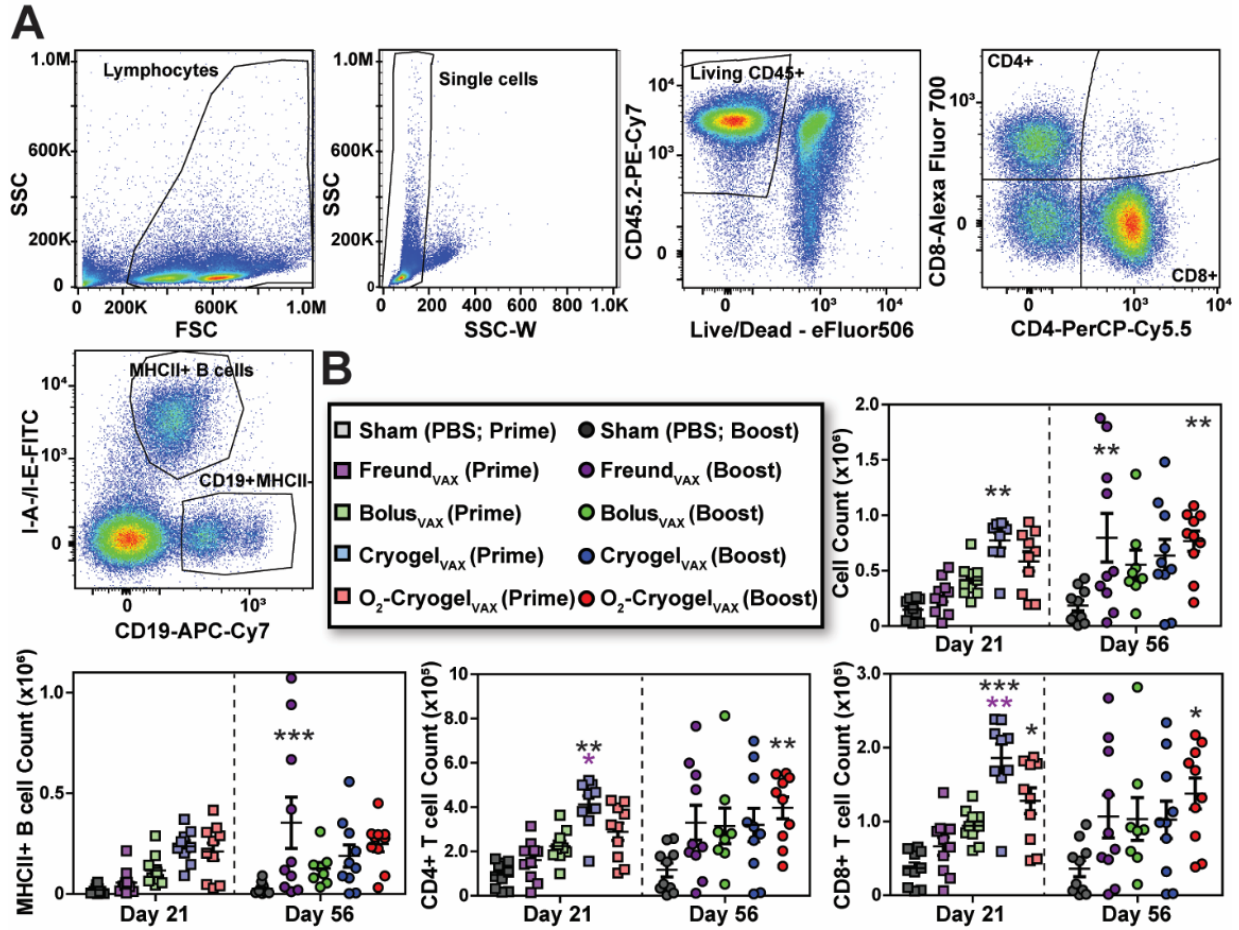

**Figure S5. Vaccination with Cryogel<sub>VAX</sub> and O<sub>2</sub>-Cryogel<sub>VAX</sub> increases adaptive immune cell numbers in draining LNs.** (A) Flow cytometry gating strategy and (B) cell numbers in LNs at day 21 and 56 post-vaccination. Two draining LNs were analyzed per animal. Values represent the mean  $\pm$  SEM (n=5). Data were analyzed using two-way ANOVA and Bonferroni post-tests to evaluate differences between conditions at the same time point (colored stars indicate statistical significance within a given condition of the same color), \*p < 0.05, \*\*p < 0.01 and \*\*\*p < 0.001.

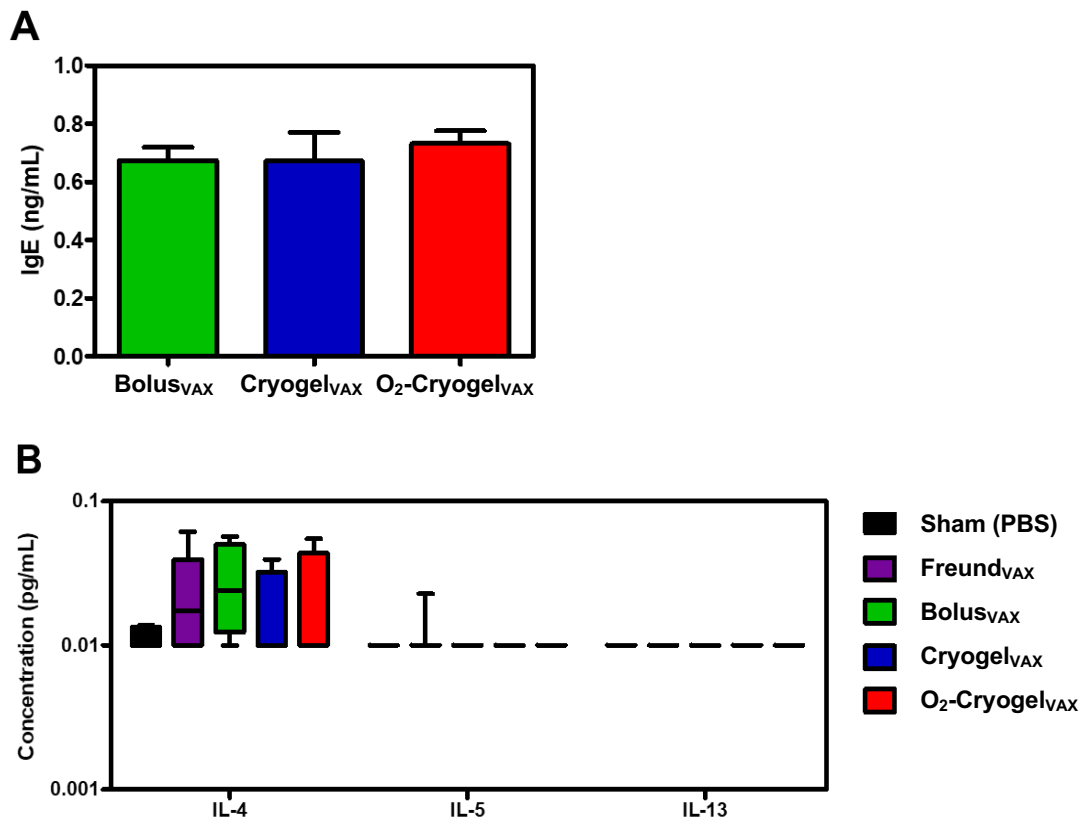

**Figure S6. Immunization with O<sub>2</sub>-Cryogel<sub>VAX</sub> does not trigger an allergic response.** (A) Mouse serum IgE titers were assessed by ELISA at day 56 across all the vaccine conditions. (B) Mouse serum IL-4, IL-5, IL-13 levels were measured at day 24 with a multiplex immunoassay across all the vaccine conditions. Values represent the mean  $\pm$  SEM (n=5).



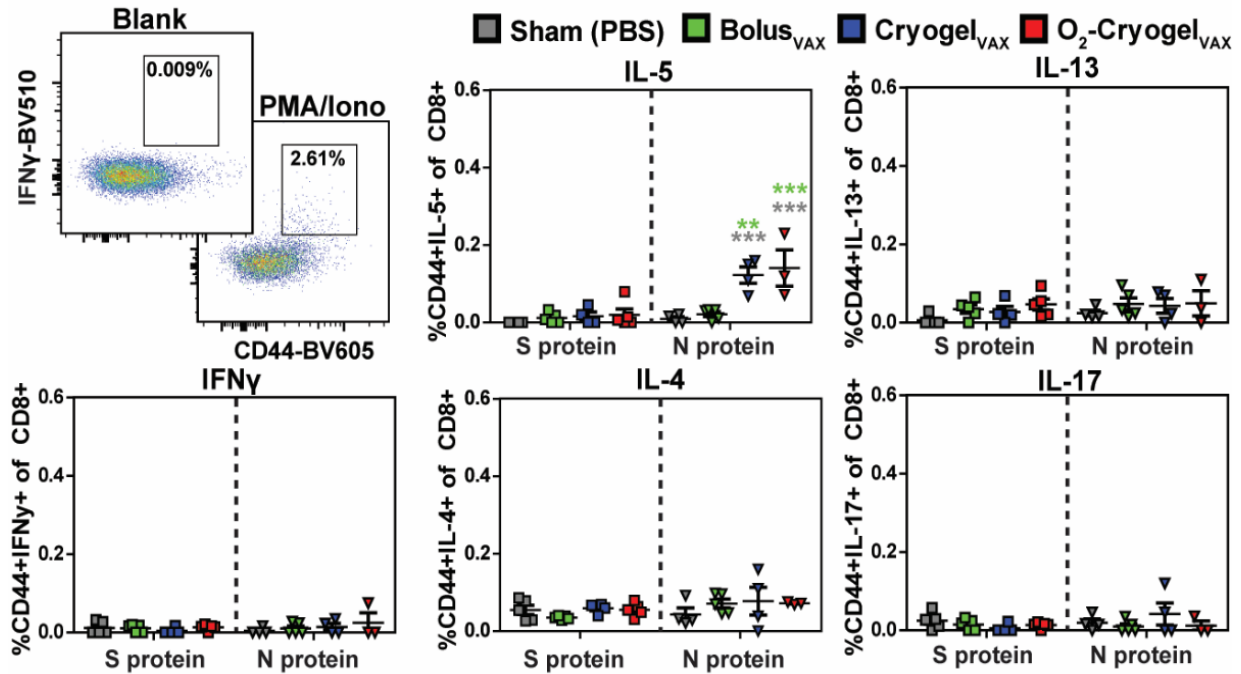

**Figure S7. O<sub>2</sub>-Cryogel<sub>VAX</sub> induces IL-5-producing N-specific CD8+ T cells.** Flow cytometry gating and frequencies of cytokine-producing CD44+CD8+ T cells following S and N protein-derived peptide stimulation of splenocytes isolated at day 21. Values represent the mean  $\pm$  SEM (n=5). Data were analyzed using two-way ANOVA and Bonferroni post-tests to evaluate the difference between conditions/treatments at the same time point (colored stars indicate statistical significance within a given condition of the same color), \*p < 0.05, \*\*p < 0.01 and \*\*\*p < 0.001.
